# Supplementary material
Source: publisher site journal article supplement (https://www.spandidos-publications.com/5417/downloadSupplementary)
Supplement: Supplementary file 1 [file downloadSupplementary]

## Sheet: supplementary Table S2
Table SII: Hub genes in WGCNA analysis.
ID	gene symbol
1	C1orf162
2	S100A9
3	FCER1G
4	FCGR3A
5	PRDX6
6	KIDINS220
7	TUBA3E
8	TUBA3D
9	MAGI1
10	GOLIM4
11	TNIK
12	SEC31A
13	ABCG2
14	PDE5A
15	INPP4B
16	SORBS2
17	ZFYVE16
18	KIF13A
19	COL21A1
20	DST
21	RPF2
22	SMOC2
23	HDAC9
24	STEAP4
25	CPED1
26	ITIH5
27	SVIL
28	ZEB1
29	PLCE1
30	DOCK1
31	LYVE1
32	ARHGEF12
33	CCND2
34	CHPT1
35	ATP2A2
36	MYH6
37	SERPINA3
38	AKAP13
39	HMOX2
40	USP11
